# Supplementary material for: Debris Removal by Activation of Endodontic Irrigants in Complex Root Canal Systems: A Standardized In-Vitro-Study
Source: MDPI journal article supplement (doi:10.3390/app11167331), 2021-08-09
Supplement: s1 [file s1]

Archive with 3 entries (3 files):
- Supplementary figure 1.tiff
- Supplementary figure 2.pdf
- Supplementary tables.pdf
