# Supplementary material for: Debris Removal by Activation of Endodontic Irrigants in Complex Root Canal Systems: A Standardized In-Vitro-Study
Source: MDPI journal article supplement (doi:10.3390/app11167331), 2021-08-09
Supplement: s1 [file s1]

Mesial roots of  
mandibular molars  
(n = 45)

**First scan**

Evaluation of the  
anatomy and initial  
root canal volume

Root canal  
preparation to size  
30.07

**Second scan**

Quantification of  
AHTD after  
preparation

Insertion of  
artificial,  
radiopaque dentin  
debris

**Third scan**

Quantification of  
the baseline volume  
of artificial debris

**Common irrigation steps:**

- 5 ml NaOCl for 1 min
- 5 ml ultrapure water for 1min
- 5 ml of EDTA for 1 min
- 5 ml ultrapure water for 1min

**Final irrigation step:**

5 ml NaOCl for 1.5 min  
(30 s activation,  
30 s resting phase,  
30 s activation)

- CNI (n = 15)
- SAI (n = 15)
- LAI (n = 15)

**Fourth scan**

Quantification of the  
residual debris volume  
after activation
