# Supplementary material for: Debris Removal by Activation of Endodontic Irrigants in Complex Root Canal Systems: A Standardized In-Vitro-Study
Source: MDPI journal article supplement (doi:10.3390/app11167331), 2021-08-09
Supplement: s1 [file s1]

## Supplementary tables

**Supplementary table 1** Root canal volumes, *P*-values of pairwise tests of different activation techniques against each other calculated by Mann-Whitney *U*-test.

|     | CNI | SAI   | LAI   |
|-----|-----|-------|-------|
| CNI | -   | 0.806 | 0.595 |
| SAI | -   | -     | 0.595 |
| LAI | -   | -     | -     |

**Supplementary table 2** Dentin debris (AHTD), *P*-values of pairwise tests of different activation techniques against each other calculated by Mann-Whitney *U*-test.

|     | CNI | SAI   | LAI   |
|-----|-----|-------|-------|
| CNI | -   | 0.624 | 0.436 |
| SAI | -   | -     | 0.744 |
| LAI | -   | -     | -     |

**Supplementary table 3** Artificial debris, *P*-values of pairwise tests of different activation techniques against each other calculated by Mann-Whitney *U*-test.

|     | CNI | SAI   | LAI   |
|-----|-----|-------|-------|
| CNI | -   | 0.713 | 0.806 |
| SAI | -   | -     | 0.806 |
| LAI | -   | -     | -     |

**Supplementary table 4** Remaining artificial debris, *P*-values of pairwise tests of different activation techniques against each other calculated by Mann-Whitney *U*-test.

|     | CNI | SAI   | LAI   |
|-----|-----|-------|-------|
| CNI | -   | 0.000 | 0.000 |
| SAI | -   | -     | 0.029 |
| LAI | -   | -     | -     |

**Supplementary table 5** Artificial debris in root thirds (coronal / middle / apical), *P*-values of pairwise tests of different activation techniques against each other calculated by Mann-Whitney *U*-test.

|     | CNI | SAI                   | LAI                   |
|-----|-----|-----------------------|-----------------------|
| CNI | -   | 0.624 / 0.389 / 0.775 | 0.683 / 0.624 / 1.000 |
| SAI | -   | -                     | 0.461 / 0.713 / 0.595 |
| LAI | -   | -                     | -                     |

**Supplementary table 6** Remaining artificial debris in root thirds (coronal / middle / apical), *P*-values of pairwise tests of different activation techniques against each other calculated by Mann-Whitney *U*-test.

|     | CNI | SAI                   | LAI                   |
|-----|-----|-----------------------|-----------------------|
| CNI | -   | 0.000 / 0.000 / 0.000 | 0.000 / 0.000 / 0.002 |
| SAI | -   | -                     | 0.806 / 0.325 / 0.174 |
| LAI | -   | -                     | -                     |
