# Supplementary figures and images for: Debris Removal by Activation of Endodontic Irrigants in Complex Root Canal Systems: A Standardized In-Vitro-Study
Source: MDPI journal article supplement (doi:10.3390/app11167331), 2021-08-09

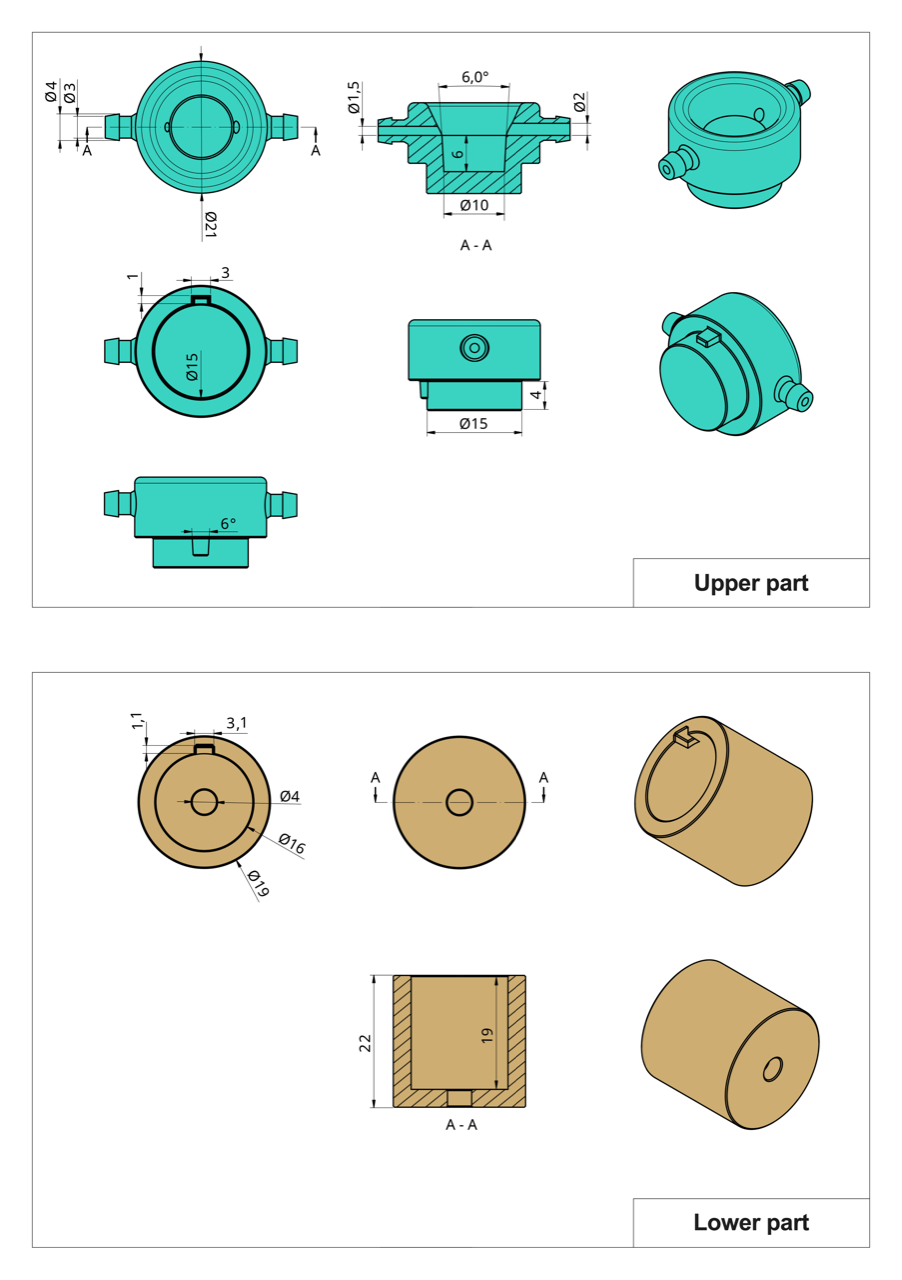

Supplement: s1 [file s1 › Supplementary figure 1.tiff]
